# Supplementary material for: Cytochrome P450 Surface Domains Prevent the β-Carotene Monohydroxylase CYP97H1 of Euglena gracilis from Acting as a Dihydroxylase
Source: MDPI journal article supplement (doi:10.3390/biom13020366), 2023-02-15
Supplement: s1 [file s1]

---

## Supplementary Information

# Cytochrome P450 surface domains prevent the $\beta$ -carotene monohydroxylase CYP97H1 of *Euglena gracilis* from acting as a dihydroxylase.

Thomas Lautier<sup>1,2,3\*</sup>; Derek J. Smith<sup>1</sup>; Lay Kien Yang<sup>1</sup>; Xixian Chen<sup>1</sup>; Congqiang Zhang<sup>1</sup>; Gilles Truan<sup>2</sup>; Nic D Lindley<sup>1,2</sup>

<sup>1</sup> Singapore Institute of Food and Biotechnology Innovation (SIFBI), Agency for Science, Technology and Research (A\*STAR), Singapore 138669, Singapore.

<sup>2</sup> Toulouse Biotechnolgy Institute, Université de Toulouse, CNRS, INRAE, INSA, 31077 Toulouse, France.

<sup>3</sup> CNRS@CREATE, 1 Create Way, #08-01 Create Tower, Singapore 138602.

\* Correspondence: thomas.lautier@cnrs.fr; Tel.: +33(0)567048813

**Table S1.** Protein sequences of the redox partner and the cytochrome P450 variants, truncated forms and the chimeras. The *E. coli* codon optimized sequences were cloned on the corresponding plasmid pTLXX.

---

### FER1 Ferredoxin *S. oleracea*

MAAYKVTLVTPTGNVEFQCPDDVYILDAAEEEGIDLPYSCRAGSCSSCAGKLKTGSLNQDDQSFLDDDQIDEGWVL  
TCAAYPVSDVTIETHKEEELTA\*

### Ferredoxin reductase *S. oleracea*

MQIASDVEAPPPAPAKVEKHSKKMEEGITVNKFKPKTPYVGRCLLNTKITGDDAPGETWHMVFSHEGEIPYREGQS  
VGVIPDGEDKNGKPHKLRLYSIASSALGDFGDAKSVSLCVKRLIYTNDAGETIKGVCSNFLCDLKPGEVKTGPVG  
KEMLMKDPNATIIMLTGTGTGIAPFRSFLWKMFEEKHDDYKFNGLAWLFLGVPTSSSLYKEEFKMKKEKAPDNFRL  
DFAVSREQTNEKGEKMYIQTRMAQYAVELWEMLKKDNTFYMCGLKGMEKGIDDIMVSLAAAEIDWIEYKRQL  
KKAQWNVVEVY\*

### pTL45: bov-CYP97H1

MALLAVFLGLSCLLLSLWGSRRKTPNRSQCLLAFTGEREGLRHQELVPIRNLDINCHGVKTSCTQLQATVEPSPEQ  
ESQLPRAEDMAIGVTAQEYVTHYIQNVAQFFVPMKWEDNIPVVSVDIFKWGAVDIPMERLLQSKLTDVFTGGFQDI  
TGVPVFILLHRYMALSPIYKLCIGPRSVVVISDAVAVKHILRSEVGKYDKGILAEVLKPIMGKGLIPADTITWLTRRRQL  
KPAFHQKWLHDQLTLYSTVGNRLVAFLAARPGQTIDMQERFCSASLDIIGKAVFNIEFGSITRESPVIQAVYAVMRE  
AERRASSIVPYWQLPGGTREFDQHMKVLDLDTSLVEQCVQQVSTEEDEEPQKGNNSLLRFLVEARGQDVTNQQL  
RDDLMTMLIAGHETTAATLTWALHELTKPENRDFLKRKVAEVDVSLGLRDFITLDDVKQMPLVRYSLVEALRLYP  
PPMLIRCLKEDHLTGVPFSGAGMTIKPGQDVMLATWSLNRDQRLWGPADKYNPLRFYTAVHGSPEYKAAGWA  
GFDPARVRGLYPDENAADFGFIPFGGGGRKCMGDQFAILESSVLLSMLLRDFSFEAADTVTLGMGATIFAKEGLMM  
KVTARPPQPPDQDEASPVAVASDALLSSVA\*

### pTL68: full-length CYP97H1

MDGDSIACTPFLRAWHWHHGLILVASSMLTIVIINAQAQQLTISSPLKSSTRSTTSVVLGGTQRYRLPPTAGTAVGTV  
VAHPNNANPSKARLHGMLVNKAIFLPLLLPIVAGIAWLRRKTPNRSQCLLAFTGEREGLRHQELVPIRNLDINCHG  
VKTSTCTQLQATVEPSPEQESQLPRAEDMAIGVTAQEYVTHYIQNVAQFFVPMKWEDNIPVVSVDIFKWGAVDIP  
ERLLQSKLTDVFTGGFQDITGVPVFILLHRYMALSPIYKLCIGPRSVVVISDAVAVKHILRSEVGKYDKGILAEVLKPI  
GKGLIPADTITWLTRRRQLKPAFHQKWLHDQLTLYSTVGNRLVAFLAARPGQTIDMQERFCSASLDIIGKAVFNIEF  
GSITRESPVIQAVYAVMREAERRASSIVPYWQLPGGTREFDQHMKVLDLDTSLVEQCVQQVSTEEDEEPQKGNNSL  
LRFLVEARGQDVTNQQLRDDLMTMLIAGHETTAATLTWALHELTKPENRDFLKRKVAEVDVSLGLRDFITLDDVK  
QMPLVRYSLVEALRLYPAPPMLIRCLKEDHLTGVPFSGAGMTIKPGQDVMLATWSLNRDQRLWGPADKYNPLR  
FYTAVHGSPEYKAAGWAGFDPARVRGLYPDENAADFGFIPFGGGGRKCMGDQFAILESSVLLSMLLRDFSFEAADT  
VTLGMGATIFAKEGLMMKVTARPPQPPDQDEASPVAVASDALLSSVA\*

### pTL70: bov-capless-CYP97H1

---

---

MALLLAVFLGLSCLLLSLWGSSPIYKLCIGPRSVVVISDAVAVKHILRSEVGKYDKGILAEVLKPIMGKGLIPADTITWL  
LTRRRQLKPAFHQKWLHDQLTLYSTVGNRLVAFLAARPGQTIDMQRFCASLDIIGKAVFNIEFGSITRESPVIQAV  
YAVMREAERRASSIVPYWQLPGGTREFDQHMKVLDLDTSLVEQCQVQVSTEEDEEPQKGNNSLRLFLVEARGQD  
VTNQQLRDDLMTMLIAGHETTAATLTWALHELTKPENRDFLKRKVAEVDVSLGLRDFITLDDVKQMPLVRYSLVE  
ALRLYPAPPMLIRRLCKEDHLTGVGPFSAGMTIKPGQDVMLATWSLNRDQRLWGPADADKYNPLRFYTAVHGSPEY  
KAAGWAGFDPARVRGLYPDENAADFGFIPFGGGGRKCMGDQFAILESSVLLSMLLRDFSFEAADTVTLGMGATIFA  
KEGLMMKVITARPPQPPDQDEASPVAVASDALLSSVA\*

**pTL71: supertruncated-CYP97H1**

MSPIYKLCIGPRSVVVISDAVAVKHILRSEVGKYDKGILAEVLKPIMGKGLIPADTITWLTRRRQLKPAFHQKWLHDQ  
LTLTLYSTVGNRLVAFLAARPGQTIDMQRFCASLDIIGKAVFNIEFGSITRESPVIQAVYAVMREAERRASSIVPYWQL  
PGGTREFDQHMKVLDLDTSLVEQCQVQVSTEEDEEPQKGNNSLRLFLVEARGQDVTNQQLRDDLMTMLIAGHET  
TAATLTWALHELTKPENRDFLKRKVAEVDVSLGLRDFITLDDVKQMPLVRYSLVEALRLYPAPPMLIRRLCKEDHLT  
GVGPFSAGMTIKPGQDVMLATWSLNRDQRLWGPADADKYNPLRFYTAVHGSPEYKAAGWAGFDPARVRGLYPDE  
NAADFGFIPFGGGGRKCMGDQFAILESSVLLSMLLRDFSFEAADTVTLGMGATIFAKEGLMMKVITARPPQPPDQDE  
ASPVAVASDALLSSVA\*

**pTL72: tCYP97H1**

MGSRRKTPNRSQCLLAFTGEREGLRHQELVPIRNLINCHGVKTSCTQLQATVEPSPEQESQLPRAEDMAIGVTAQE  
YVTHYIQNVAQFFVPMKWEDNIPVVSVDIFKWGAVDIPMERLLQSKLTDVFTGGFQDITGVPVFILLHRYMALSPIY  
KLCIGPRSVVVISDAVAVKHILRSEVGKYDKGILAEVLKPIMGKGLIPADTITWLTRRRQLKPAFHQKWLHDQLTLYS  
TVGNRLVAFLAARPGQTIDMQRFCASLDIIGKAVFNIEFGSITRESPVIQAVYAVMREAERRASSIVPYWQLPGGT  
REFDQHMKVLDLDTSLVEQCQVQVSTEEDEEPQKGNNSLRLFLVEARGQDVTNQQLRDDLMTMLIAGHETTAAT  
LTWALHELTKPENRDFLKRKVAEVDVSLGLRDFITLDDVKQMPLVRYSLVEALRLYPAPPMLIRRLCKEDHLTGVGP  
FSAGMTIKPGQDVMLATWSLNRDQRLWGPADADKYNPLRFYTAVHGSPEYKAAGWAGFDPARVRGLYPDENAAD  
FGFIPFGGGGRKCMGDQFAILESSVLLSMLLRDFSFEAADTVTLGMGATIFAKEGLMMKVITARPPQPPDQDEASPV  
VASDALLSSVA\*

**pTL73: capless CYP97H1**

MDGDSIACTPFLRAWHWHHGLILVASSMLTIVIINAQAQQLTISSPLKSSTRSTTSVVLGGTQRYRLPPTAGTAVGTV  
VAHPNANANPSKARLHGMLVNKAIFLPLLLPIVAGIAWLSPIYKLCIGPRSVVVISDAVAVKHILRSEVGKYDKGILAE  
VLKPIMGKGLIPADTITWLTRRRQLKPAFHQKWLHDQLTLYSTVGNRLVAFLAARPGQTIDMQRFCASLDIIGKA  
VFNIEFGSITRESPVIQAVYAVMREAERRASSIVPYWQLPGGTREFDQHMKVLDLDTSLVEQCQVQVSTEEDEEPQ  
KGNNSLRLFLVEARGQDVTNQQLRDDLMTMLIAGHETTAATLTWALHELTKPENRDFLKRKVAEVDVSLGLRDFI  
TLDDVKQMPLVRYSLVEALRLYPAPPMLIRRLCKEDHLTGVGPFSAGMTIKPGQDVMLATWSLNRDQRLWGPAD  
KYNPLRFYTAVHGSPEYKAAGWAGFDPARVRGLYPDENAADFGFIPFGGGGRKCMGDQFAILESSVLLSMLLRDFS  
FEAADTVTLGMGATIFAKEGLMMKVITARPPQPPDQDEASPVAVASDALLSSVA\*

**pTL79: M182-CYP97H1**

MAIGVTAQEYVTHYIQNVAQFFVPMKWEDNIPVVSVDIFKWGAVDIPMERLLQSKLTDVFTGGFQDITGVPVFILL  
HRYMALSPIYKLCIGPRSVVVISDAVAVKHILRSEVGKYDKGILAEVLKPIMGKGLIPADTITWLTRRRQLKPAFHQK  
WLHDQLTLYSTVGNRLVAFLAARPGQTIDMQRFCASLDIIGKAVFNIEFGSITRESPVIQAVYAVMREAERRASSI  
VPYWQLPGGTREFDQHMKVLDLDTSLVEQCQVQVSTEEDEEPQKGNNSLRLFLVEARGQDVTNQQLRDDLMTML  
LIAGHETTAATLTWALHELTKPENRDFLKRKVAEVDVSLGLRDFITLDDVKQMPLVRYSLVEALRLYPAPPMLIRRL  
CKEDHLTGVGPFSAGMTIKPGQDVMLATWSLNRDQRLWGPADADKYNPLRFYTAVHGSPEYKAAGWAGFDPARV  
RGLYPDENAADFGFIPFGGGGRKCMGDQFAILESSVLLSMLLRDFSFEAADTVTLGMGATIFAKEGLMMKVITARPP  
QPPDQDEASPVAVASDALLSSVA\*

**pTL80: M206-CYP97H1**

MKWEDNIPVVSVDIFKWGAVDIPMERLLQSKLTDVFTGGFQDITGVPVFILLHRYMALSPIYKLCIGPRSVVVISDAV  
AVKHILRSEVGKYDKGILAEVLKPIMGKGLIPADTITWLTRRRQLKPAFHQKWLHDQLTLYSTVGNRLVAFLAARPG  
QTIDMQRFCASLDIIGKAVFNIEFGSITRESPVIQAVYAVMREAERRASSIVPYWQLPGGTREFDQHMKVLDLDT  
SLVEQCQVQVSTEEDEEPQKGNNSLRLFLVEARGQDVTNQQLRDDLMTMLIAGHETTAATLTWALHELTKPENRD  
FLKRKVAEVDVSLGLRDFITLDDVKQMPLVRYSLVEALRLYPAPPMLIRRLCKEDHLTGVGPFSAGMTIKPGQDVML  
ATWSLNRDQRLWGPADADKYNPLRFYTAVHGSPEYKAAGWAGFDPARVRGLYPDENAADFGFIPFGGGGRKCMG  
DQFAILESSVLLSMLLRDFSFEAADTVTLGMGATIFAKEGLMMKVITARPPQPPDQDEASPVAVASDALLSSVA\*

**pTL81: tCYP97H1-fullAt: entire F'-G' loop 26 residues from CYP97A3At**

---

---

MGSRRKTPNRSQCLLAFTGEREGLRHQELVPIRNLDINCHGVKTSCTQLQATVEPSPEQESQLPRAEDMAIGVTAQE  
YVTHYIQNVAQFFVPMKWEDNIPVVSVDIFKWGAVDIPMERLLQSKLTDVFTGGFQDITGVPVFILLHRYMALSPIY  
KLCIGPRSVVVISDAVAVKHILRSEVGKYDKGILAEVLKPIMGKGLIPADTITWLTRRRQLKPAFHQKWLHDQLTLYS  
TVGNRLVAFLAARPGQTIDMQUERFCSASLDIIGKAVFNIEFGSITRESPVIQAVYAVMREAERRSVSPVWDIPIWKD  
ISPRQRKVAQHMKVLDDVLTSLVEQCQVQVSTEEDEEPQKGNNLSLLRFLVEARGQDVTNQQLRDDLMTMLIAGHE  
TTAATLTWALHELTKPENRDFLKRKVAEVDVSLGLRDFITLDDVKQMPLVRYSLVEALRLYPAPPMLIRRLCKEDHL  
TGVGPFSAAGMTIKPGQDVMLATWSLNRDQRLWGPADADKYNPLRFYTAVHGSPEYKAAGWAGFDPARVRGLYPDE  
NAADFGFIPFGGGGRKCMGDQFAILESSVLLSMLLRDFSFEAADTVTLGMGATIFAKEGLMMKV TARPPQPPDQDE  
ASPVAVASDALLSSVA\*

**pTL82: tCYP97H1-6At: 6 missing counterpart residues from CYP97A3At**

MGSRRKTPNRSQCLLAFTGEREGLRHQELVPIRNLDINCHGVKTSCTQLQATVEPSPEQESQLPRAEDMAIGVTAQE  
YVTHYIQNVAQFFVPMKWEDNIPVVSVDIFKWGAVDIPMERLLQSKLTDVFTGGFQDITGVPVFILLHRYMALSPIY  
KLCIGPRSVVVISDAVAVKHILRSEVGKYDKGILAEVLKPIMGKGLIPADTITWLTRRRQLKPAFHQKWLHDQLTLYS  
TVGNRLVAFLAARPGQTIDMQUERFCSASLDIIGKAVFNIEFGSITRESPVIQAVYAVMREAERRASSIVPYWQLPGGK  
GYQSPSREFDQHMKVLDVLTSLVEQCQVQVSTEEDEEPQKGNNLSLLRFLVEARGQDVTNQQLRDDLMTMLIAGH  
ETTAATLTWALHELTKPENRDFLKRKVAEVDVSLGLRDFITLDDVKQMPLVRYSLVEALRLYPAPPMLIRRLCKEDH  
LTGVGPFSAAGMTIKPGQDVMLATWSLNRDQRLWGPADADKYNPLRFYTAVHGSPEYKAAGWAGFDPARVRGLYPD  
ENAADFGFIPFGGGGRKCMGDQFAILESSVLLSMLLRDFSFEAADTVTLGMGATIFAKEGLMMKV TARPPQPPDQD  
EASPVAVASDALLSSVA\*

**pTL83: tCYP97A3At**

MSFPSTVKNGLSKIGIPSNVLDPMFDWTGSDQDYPKVPEAKGSIQAVRNEAFFIPLYELFLTYGGIFRLTFGPKSFLIVS  
DPSIAKHILKDNAKAYSKGILAEILDFVMGKGLIPADGEIWRRRRRRAIVPALHQKYVAAMISLFGESDRLCQKLDA  
AALKGEEVEMESLFSRLTLDIIGKAVFNIDFDSL TNDTGVI EAVYTVLREAEDRSVSPVWDIPIWKDISPRQRKVATS  
LKLINDTLDDLIATCKRMVEEEELQFH E EYMNERDPSILHFLASGDDVSSKQLRDDLMTMLIAGHETSAAVLTWTF  
YLLTTEPSVVAKLQEEVDSVIGDRFPTIQDMKKLKYTTRVMNESLRLYPQPPVLIRRSIDNDILGEYPIKRGEDIFISVW  
NLHRSPLHWDDAEKFNPERWPLDGPNPNETNQNF SYLPFGGGPRKCIGDMFASFENVVAIAMLIRRFNFQIAPGAP  
PVKMTTGATIHTEGLKLTVTKRTPKPLDIPSPILPMDTSRDEVSSALS\*

**pTL84: Nterm97H1-CYP97A3At**

MGSRRKTPNRSQCLLAFTGEREGLRHQELVPIRNLDINCHGVKTSCTQLQATVEPSPEQESQLPRAEDMAIGVTAQE  
YVTHYIQNVAQFFVPMKWEDNIPVVSVDIFKWGAVDIPMERLLQSKLTDVFTGGFQDITGVPVFILLHRYMALSFPS  
TVKNGLSKIGIPSNVLDPMFDWTGSDQDYPKVPEAKGSIQAVRNEAFFIPLYELFLTYGGIFRLTFGPKSFLIVSDPSIAK  
HILKDNAKAYSKGILAEILDFVMGKGLIPADGEIWRRRRRRAIVPALHQKYVAAMISLFGESDRLCQKLDA AALKGE  
EVEMESLFSRLTLDIIGKAVFNIDFDSL TNDTGVI EAVYTVLREAEDRSVSPVWDIPIWKDISPRQRKVATSLKLIND  
TLDDLIATCKRMVEEEELQFH E EYMNERDPSILHFLASGDDVSSKQLRDDLMTMLIAGHETSAAVLTWTFYLLTTE  
PSVVAKLQEEVDSVIGDRFPTIQDMKKLKYTTRVMNESLRLYPQPPVLIRRSIDNDILGEYPIKRGEDIFISVWNLHRSP  
LHWDDAEKFNPERWPLDGPNPNETNQNF SYLPFGGGPRKCIGDMFASFENVVAIAMLIRRFNFQIAPGAPPVKMTT  
GATIHTEGLKLTVTKRTPKPLDIPSPILPMDTSRDEVSSALS\*

**pTL88: tCYP97H1 with substrate channel from CYP97AA1**

MGSRRKTPNRSQCLLAFTGEREGLRHQELVPIRNLDINCHGVKTSCTQLQATVEPSPEQESQLPRAEDMAIGVTAQE  
YVTHYIQNVAQFFVPMKWEDNIPVVSVDIFKWGAVDIPMERLLQSKLTDVFTGGFQDITGVPVFILLHRYMALSPIY  
KLCIFGPRSFVVISDAVAVKHILRSEVGKYDKGILAEILKPIMGKGLIPADTITWLTRRRQLKPAFHQKWLHDQLTLYS  
TVGNRLVAFLAARPGQTIDMQUERFCSASLDIIGKAVFNIEFGSITRESPVIQAVYAVMREAERRASSIIPYWQLPGGTR  
EFDQHMKVLDVLTSLVEQCQVQVSTEEDEEPQKGNNLSLLRFLVEARGQDVTNQQLRDDLMTMLIAGHETTAATL  
TWALHELTKPENRDFLKRKVAEVDVSLGLRDFITLDDVKQMPLVRYSLVEALRLYPAPPVLIRRLCKEDHLTGVGPF  
SAGMTIKPGQDVFLATWSLNRDQRLWGPADADKYNPLRFYTAVHGSPEYKAAGWAGFDPARVRGLYPDENAADF  
GFIPFGGGGRKCMGDQFAILESSVLLSMLLRDFSFEAADTVTLGMGATIFAKEGLMMKV TARPPQPPDQDEASPVAV  
ASDALLSSVA\*

**pTL91: tCYP97H1 F105A**

MGSRRKTPNRSQCLLAFTGEREGLRHQELVPIRNLDINCHGVKTSCTQLQATVEPSPEQESQLPRAEDMAIGVTAQE  
YVTHYIQNVAQFFVPMKWEDNIPVVSVDIFKWGAVDIPMERLLQSKLTDVFTGGFQDITGVPVFILLHRYMALSPI  
YKLCIGPRSVVVISDAVAVKHILRSEVGKYDKGILAEVLKPIMGKGLIPADTITWLTRRRQLKPAFHQKWLHDQLTLY  
STVGNRLVAFLAARPGQTIDMQUERFCSASLDIIGKAVFNIEFGSITRESPVIQAVYAVMREAERRASSIVPYWQLPGGT

---

---

REFDQHMKVLDDVLTSLVEQCQVQVSTEEDEEPQKGNNSLRFLVEARGQDVTNQQLRDDLMTMLIAGHETTAAT  
LTWALHELTKPENRDFLKRKVAEVD SVLGLRDFITLDDVKQMPLVRYSLVEALRLYPAPPMLIRRCLKEDHLTG VGP  
FSAGMTIKPGQDVMLATWSLNRDQRLWGP DADKYNPLRFYTAVHGSPEYKAAGWAGFDPARVRGLYPDENAAD  
FGFIPFGGGGRKCMGDQFAILESSVLLSMLLRDFSFEAADTVTLGMGATIFAKEGLMMKV TARPPQPPDQDEAS PVA  
VASDALLSSVA\*

**pTL92: tCYP97H1 F108A**

MGSRRKTPNRSQCLLAFTGEREGLRHQELVPIRNL DINCHGVKTSCTQLQATVEPSPEQESQLPRAEDMAIGVTAQE  
YVTHYIQNVAQFFVPMKWEDNIPVVS VFDIAKWGAVDIPMERLLQSKLTDVFTGGFQDITGVPVFILLHRYMALSPI  
YKLCIGPRSVVVISDAVAVKHILRSEVGKYDKGILAEVLKPI MGKGLIPADTITWLTRRRQLKPAFHQKWLHDQLTLY  
STVGNRLVAFLAARPGQTIDMQERFCSASLDIIGKAVFN YEFGSITRESPVIQAVYAVMREAERRASSIVPYWQLPGGT  
REFDQHMKVLDDVLTSLVEQCQVQVSTEEDEEPQKGNNSLRFLVEARGQDVTNQQLRDDLMTMLIAGHETTAAT  
LTWALHELTKPENRDFLKRKVAEVD SVLGLRDFITLDDVKQMPLVRYSLVEALRLYPAPPMLIRRCLKEDHLTG VGP  
FSAGMTIKPGQDVMLATWSLNRDQRLWGP DADKYNPLRFYTAVHGSPEYKAAGWAGFDPARVRGLYPDENAAD  
FGFIPFGGGGRKCMGDQFAILESSVLLSMLLRDFSFEAADTVTLGMGATIFAKEGLMMKV TARPPQPPDQDEAS PVA  
VASDALLSSVA\*

**pTL93: tCYP97H1 F129A**

MGSRRKTPNRSQCLLAFTGEREGLRHQELVPIRNL DINCHGVKTSCTQLQATVEPSPEQESQLPRAEDMAIGVTAQE  
YVTHYIQNVAQFFVPMKWEDNIPVVS VFDIFKWGAVDIPMERLLQSKLTDVATGGFQDITGVPVFILLHRYMALSPI  
YKLCIGPRSVVVISDAVAVKHILRSEVGKYDKGILAEVLKPI MGKGLIPADTITWLTRRRQLKPAFHQKWLHDQLTLY  
STVGNRLVAFLAARPGQTIDMQERFCSASLDIIGKAVFN YEFGSITRESPVIQAVYAVMREAERRASSIVPYWQLPGGT  
REFDQHMKVLDDVLTSLVEQCQVQVSTEEDEEPQKGNNSLRFLVEARGQDVTNQQLRDDLMTMLIAGHETTAAT  
LTWALHELTKPENRDFLKRKVAEVD SVLGLRDFITLDDVKQMPLVRYSLVEALRLYPAPPMLIRRCLKEDHLTG VGP  
FSAGMTIKPGQDVMLATWSLNRDQRLWGP DADKYNPLRFYTAVHGSPEYKAAGWAGFDPARVRGLYPDENAAD  
FGFIPFGGGGRKCMGDQFAILESSVLLSMLLRDFSFEAADTVTLGMGATIFAKEGLMMKV TARPPQPPDQDEAS PVA  
VASDALLSSVA\*

**pTL94: tCYP97H1 F133A**

MGSRRKTPNRSQCLLAFTGEREGLRHQELVPIRNL DINCHGVKTSCTQLQATVEPSPEQESQLPRAEDMAIGVTAQE  
YVTHYIQNVAQFFVPMKWEDNIPVVS VFDIFKWGAVDIPMERLLQSKLTDVFTGGAQDITGVPVFILLHRYMALSPI  
YKLCIGPRSVVVISDAVAVKHILRSEVGKYDKGILAEVLKPI MGKGLIPADTITWLTRRRQLKPAFHQKWLHDQLTLY  
STVGNRLVAFLAARPGQTIDMQERFCSASLDIIGKAVFN YEFGSITRESPVIQAVYAVMREAERRASSIVPYWQLPGGT  
REFDQHMKVLDDVLTSLVEQCQVQVSTEEDEEPQKGNNSLRFLVEARGQDVTNQQLRDDLMTMLIAGHETTAAT  
LTWALHELTKPENRDFLKRKVAEVD SVLGLRDFITLDDVKQMPLVRYSLVEALRLYPAPPMLIRRCLKEDHLTG VGP  
FSAGMTIKPGQDVMLATWSLNRDQRLWGP DADKYNPLRFYTAVHGSPEYKAAGWAGFDPARVRGLYPDENAAD  
FGFIPFGGGGRKCMGDQFAILESSVLLSMLLRDFSFEAADTVTLGMGATIFAKEGLMMKV TARPPQPPDQDEAS PVA  
VASDALLSSVA\*

**pTL95: K117-A127At-CYP97H1**

MGSRRKTPNRSQCLLAFTGEREGLRHQELVPIRNL DINCHGVKTSCTQLQATVEPSPEQESQLPRAEDMAIGVTAQE  
YVTHYIQNVAQFFVPMKWEDNIPVVK GSIQAVRNEAVFILLHRYMALSPIYKLCIGPRSVVVISDAVAVKHILRSEVG  
KYDKGILAEVLKPI MGKGLIPADTITWLTRRRQLKPAFHQKWLHDQLTLYSTVGNRLVAFLAARPGQTIDMQERFCS  
ASLDIIGKAVFN YEFGSITRESPVIQAVYAVMREAERRASSIVPYWQLPGGTREFDQHMKVLDDVLTSLVEQCQVQVS  
TEEDEEPQKGNNSLRFLVEARGQDVTNQQLRDDLMTMLIAGHETTAATLTWALHELTKPENRDFLKRKVAEVD S  
VLGLRDFITLDDVKQMPLVRYSLVEALRLYPAPPMLIRRCLKEDHLTG VGPFSAGMTIKPGQDVMLATWSLNRDQR  
LWGP DADKYNPLRFYTAVHGSPEYKAAGWAGFDPARVRGLYPDENAADFGFIPFGGGGRKCMGDQFAILESSVLL  
SMLLRDFSFEAADTVTLGMGATIFAKEGLMMKV TARPPQPPDQDEAS PVAVASDALLSSVA\*

**pTL96: M182-K117-A127At-CYP97H1**

MAIGVTAQEYVTHYIQNVAQFFVPMKWEDNIPVVK GSIQAVRNEAVFILLHRYMALSPIYKLCIGPRSVVVISDAVAV  
VKHILRSEVGKYDKGILAEVLKPI MGKGLIPADTITWLTRRRQLKPAFHQKWLHDQLTLYSTVGNRLVAFLAARPGQ  
TIDMQERFCSASLDIIGKAVFN YEFGSITRESPVIQAVYAVMREAERRASSIVPYWQLPGGTREFDQHMKVLDDVLT S  
LVEQCQVQVSTEEDEEPQKGNNSLRFLVEARGQDVTNQQLRDDLMTMLIAGHETTAATLTWALHELTKPENRDF  
LKRKVAEVD SVLGLRDFITLDDVKQMPLVRYSLVEALRLYPAPPMLIRRCLKEDHLTG VGPFSAGMTIKPGQDVMLA  
TWSLNRDQRLWGP DADKYNPLRFYTAVHGSPEYKAAGWAGFDPARVRGLYPDENAADFGFIPFGGGGRKCMGD  
QFAILESSVLLSMLLRDFSFEAADTVTLGMGATIFAKEGLMMKV TARPPQPPDQDEAS PVAVASDALLSSVA\*

---

---

**pTL98: MBP-CYP97A3At**

MKIEEGKLVWINGDKGYNGLAEVGKKFEKDTGIKVTVEHPDKLEEKFPQVAATGDGPDIIFWAHDRFGGYAQSGL  
LAEITPDKAFQDKLYPFTWDAVRYNGKLIAYPIAVEALSLIYNKDLLPNPPKTWEEIPALDKELKAKGKSALMFNLQ  
EPYFTWPLIAADGGYAFKYENGKYDIKDVGVNDAGAKAGLTFLVDLIK NKHMNADTDYSIAEAAFNKGETAMTIN  
GPWAWSNIDTSKVNYGVTVLPTFKGQPSKPFVGVLSAGINAASPNKELAKEFLENYLLTDEGLEAVNKDKPLGAVA  
LKSYYYELAKDPRIAATMENAQKGEIMPNIQMSAFWYAVRTAVINAASGRQTVDEALKDAQTNSSSHHHHHHA  
NSENLYFQGSFPSTVKNGLSKIGIPSNVLDFMFDWTGSDQDYPKVPEAKGSIQAVRNEAFFIPLYELFLTYGGIFRLTF  
GPKSFLIVSDPSIAKHILKDNAKAYSKGILAEILDFVMGKGLIPADGEIWRRRRRRAIVPALHQKYVAAMISLFGASDR  
LCQKLDAAALKGEEVEMESLFSRLTLDIIGKAVFNDFDSLNTDTGVIEAVYTVLREAEDRSVSPVWDIPIWKDISP  
RQRKVATSLKLINDTLDDLIATCKRMVEEEELQFHEEYMNERDPSILHFLASGDDVSSKQLRDDLMTMLIAGHETS  
AAVLTWTFYLLTTEPSVVAKLQEEVDSVIGDRFPTIQDMKKLKYTTRVMNESLRLYPQPPVLIRRSIDNDILGEYPIKR  
GEDIFISVWNLHRSPLHWDDAEKFNPERWPLDGPNPNETNQNFSYLPFGGGPRKCIGDMFASFENVVAIAMLIRRF  
NFQIAPGAPPVKMTTGATIHTEGLKLTVTKRTKPLDIPSPILPMDTSRDEVSSALS\*

---

## A: 450nm chromatogram

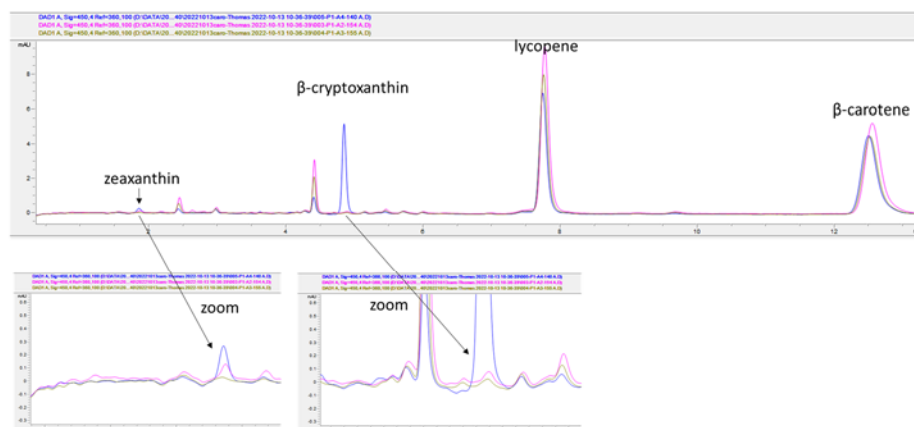

## B: $\beta$ -cryptoxanthin

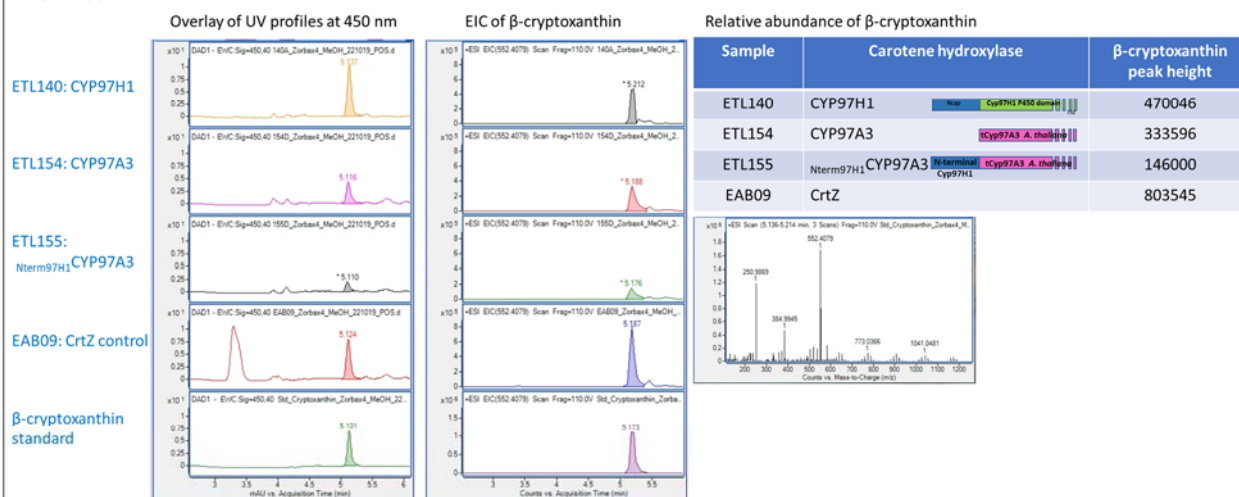

## C: Zeaxanthin

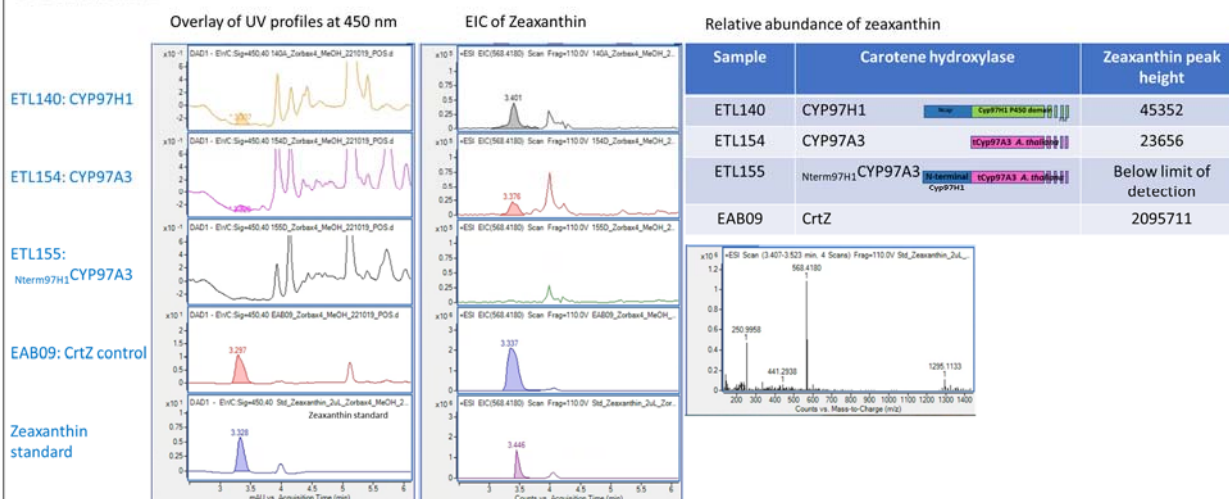

**Figure S1. A:** full 450nm chromatogram overlay of the acetone extracts from the strains ETL140: CYP97H1 (blue), ETL154: CYP97A3At (pink), ETL155: NtermCYP97H1 fused to CYP97A3At (gold), peaks at 2.4; 2.9 and 4.4 min are also present in the control strain ETL91 which does not express any hydroxylases. **B:**  $\beta$ -cryptoxanthin detection (visible spectra and mass spectrometry analysis). Same samples as in panel A, with the addition of EAB09 (strain expressing the non heme dihydroxylase CrtZ as zeaxanthin producer control). **C:** Zeaxanthin detection (visible spectra and mass spectrometry analysis). Same samples as in panel B.
